# Supplementary material
Source: PubMed Central journal article supplement (PMC6435352)
Supplement: Supp_Figure1.pdf [file Supp_Figure1.pdf]

## Supplementary Data

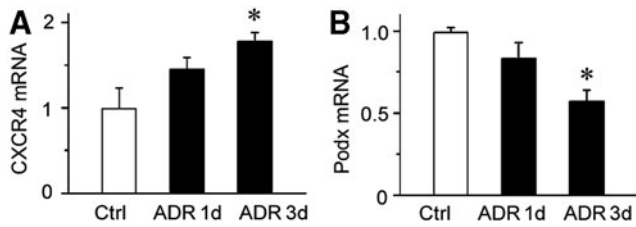

**SUPPLEMENTARY FIG. S1. The mRNA expressions of CXCR4 and podocalyxin are changed after ADR injection.** Graphical representations of the relative abundances of CXCR4 (A) and podocalyxin (Podx) (B) mRNA in different groups as indicated. \* $p < 0.05$  versus normal controls ( $n = 5-6$ ). ADR, adriamycin nephropathy; CXCR4, C-X-C chemokine receptor type 4; mRNA, messenger RNA.
